# Supplementary material for: Comparison of inbred mouse strains shows diverse phenotypic outcomes of intervertebral disc aging
Source: PubMed Central journal article supplement (PMC7253061; doi:10.1111/acel.13148), 2020-04-22

Supplementary Figure 1

**A**

23-Month-old Mice

BL6 LG/J SM/J

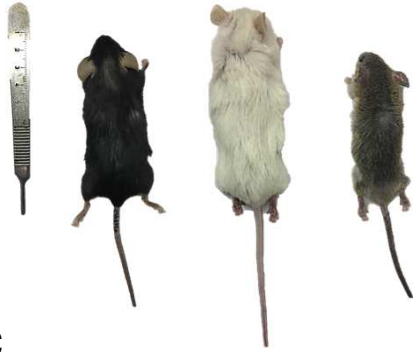

**C**

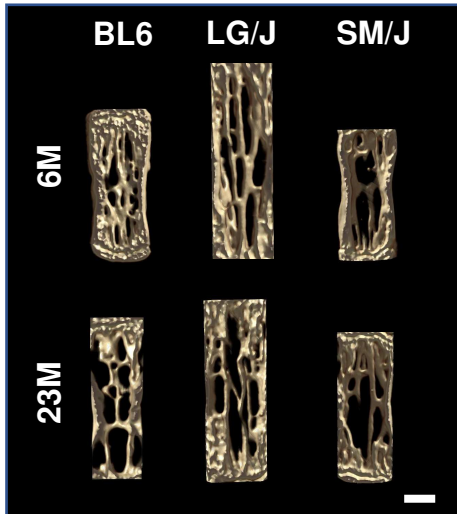

**E**

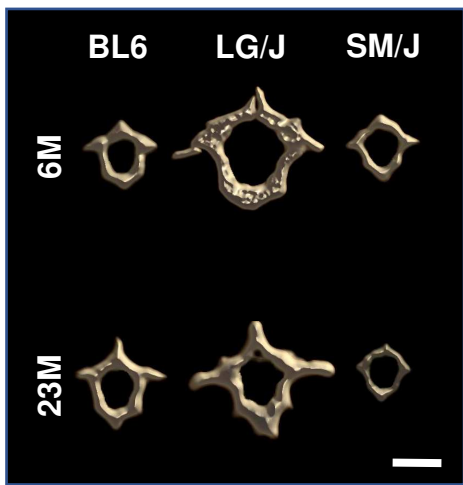

**B**

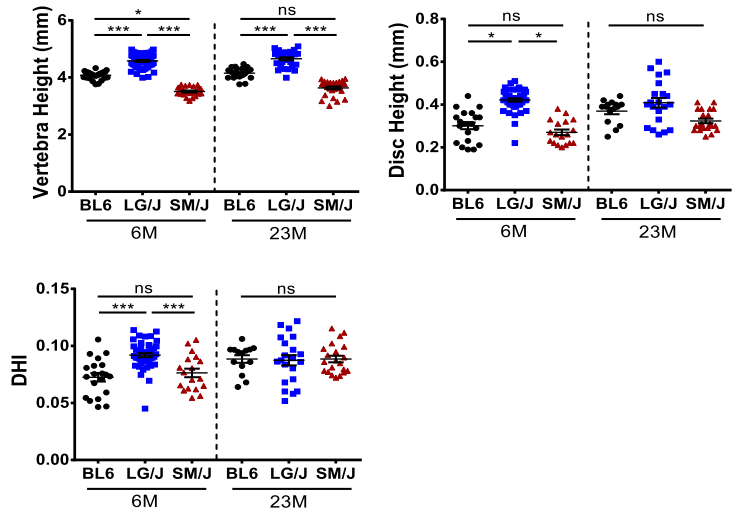

**D**

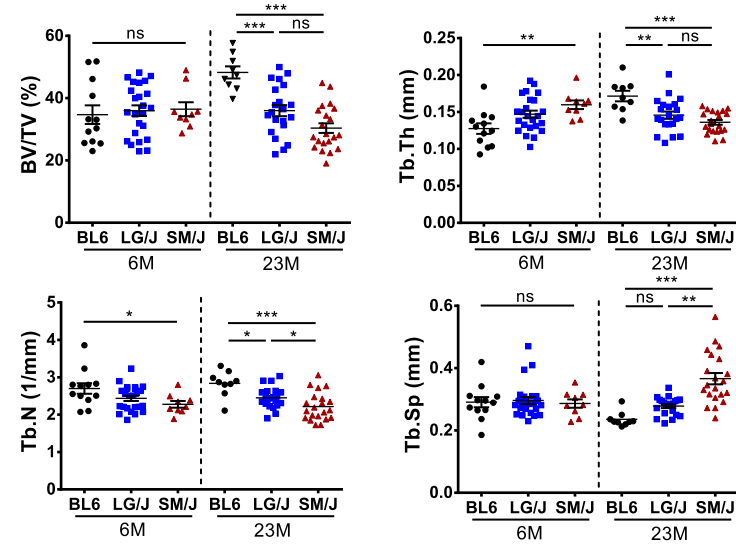

**F**

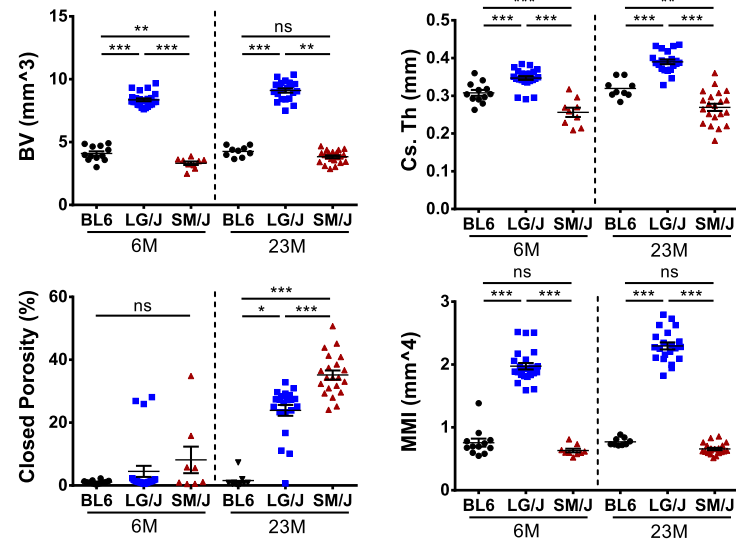

Supplementary Figure 2

A

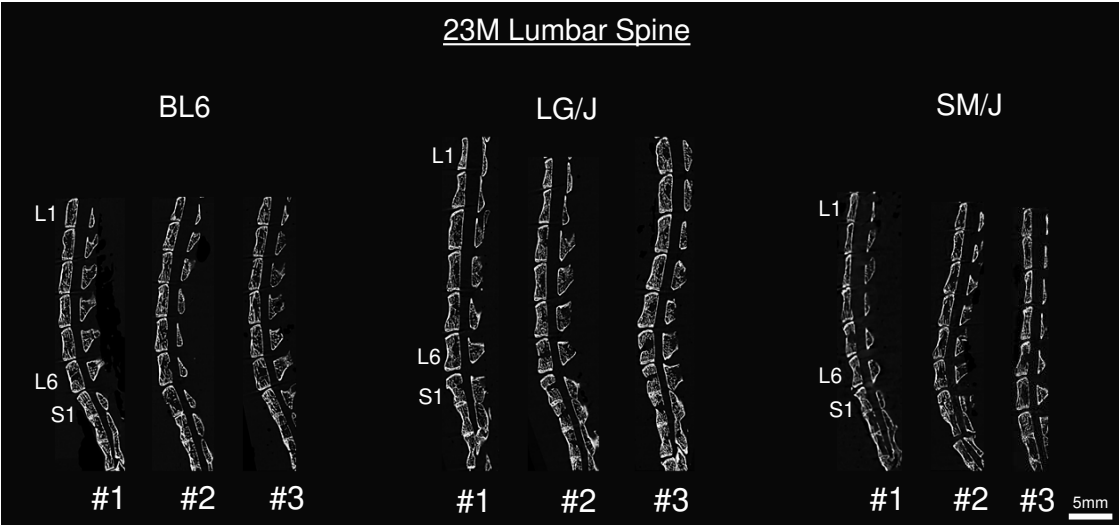

B

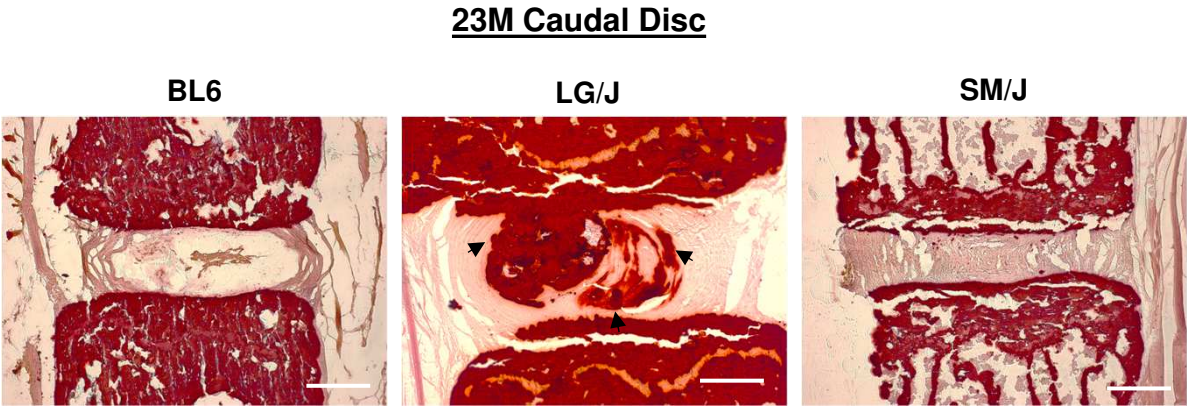

# A Modified Thompson Grading

- NP Grading:**
- 1. Aggrecan-rich bulging tissue
  - 2. Peripheral fibrous tissue
  - 3. Consolidated fibrous tissue
  - 4. Horizontal clefts parallel to endplate
  - 5. Clefts through NP and AF (herniation)

- AF Grading:**
- 1. Discrete fibrous lamellae
  - 2. Mucinous material between lamellae
  - 3. Extensive mucinous material and/or loss of NP-AF demarcation
  - 4. Focal clefts
  - 5. Clefts through NP and AF (herniation)

# B 23 MONTH HISTOLOGY

IVD Degeneration

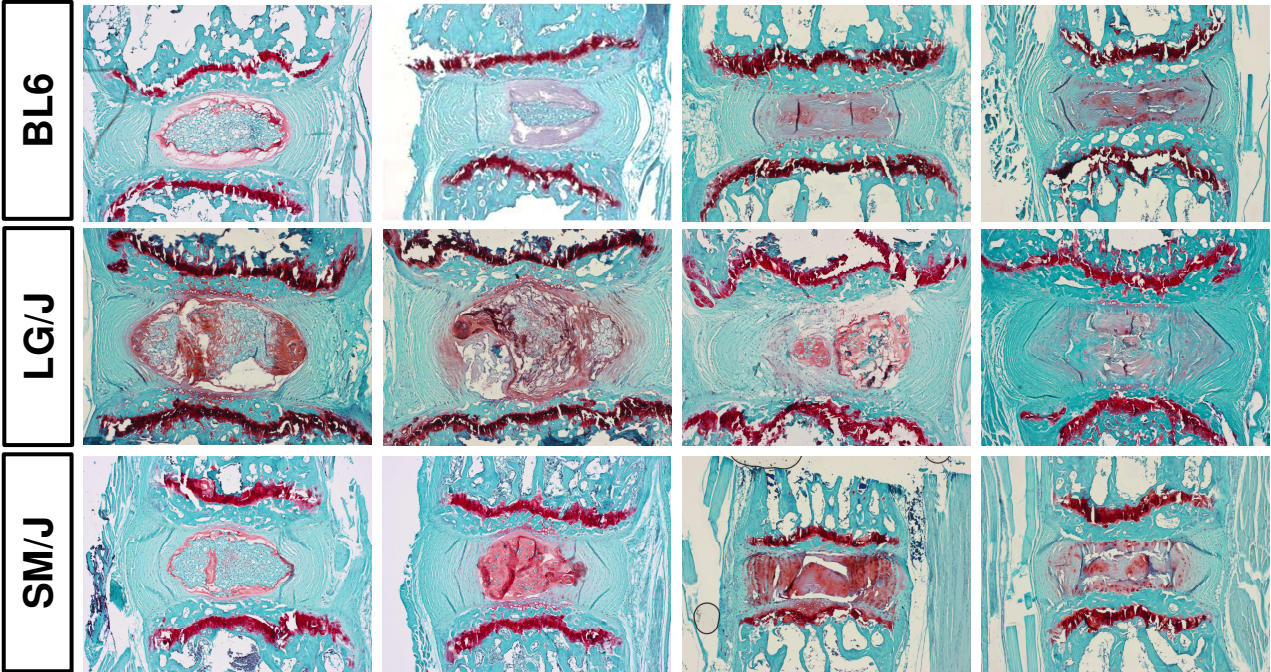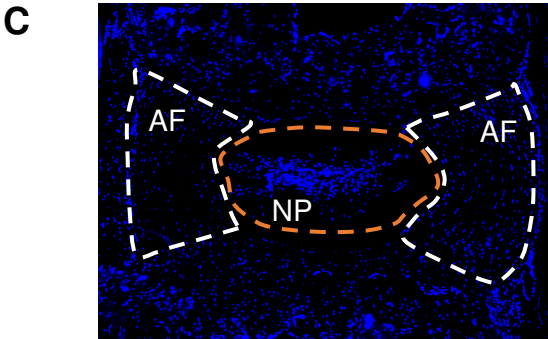

Supplementary Figure 4

**A**

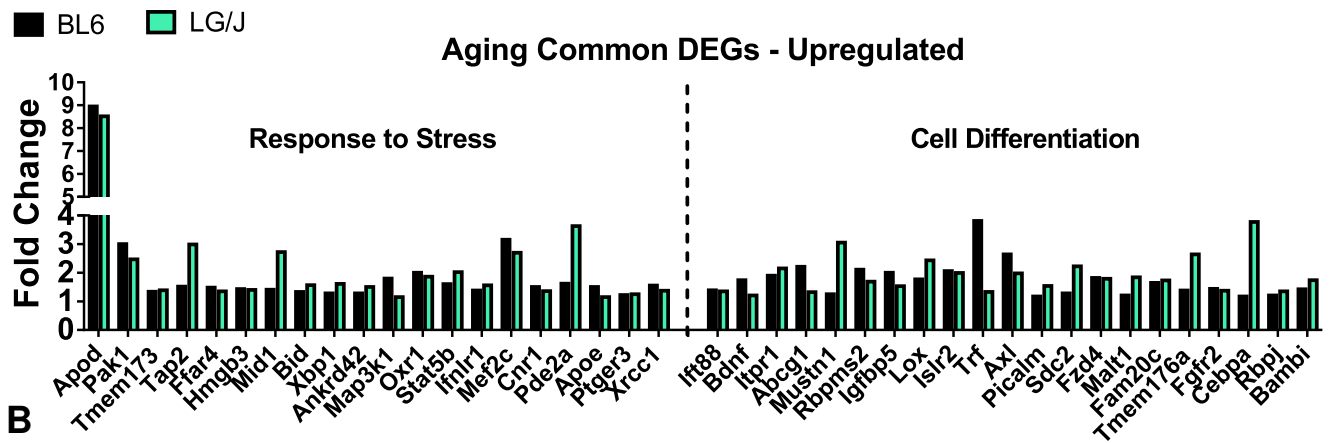

**B**

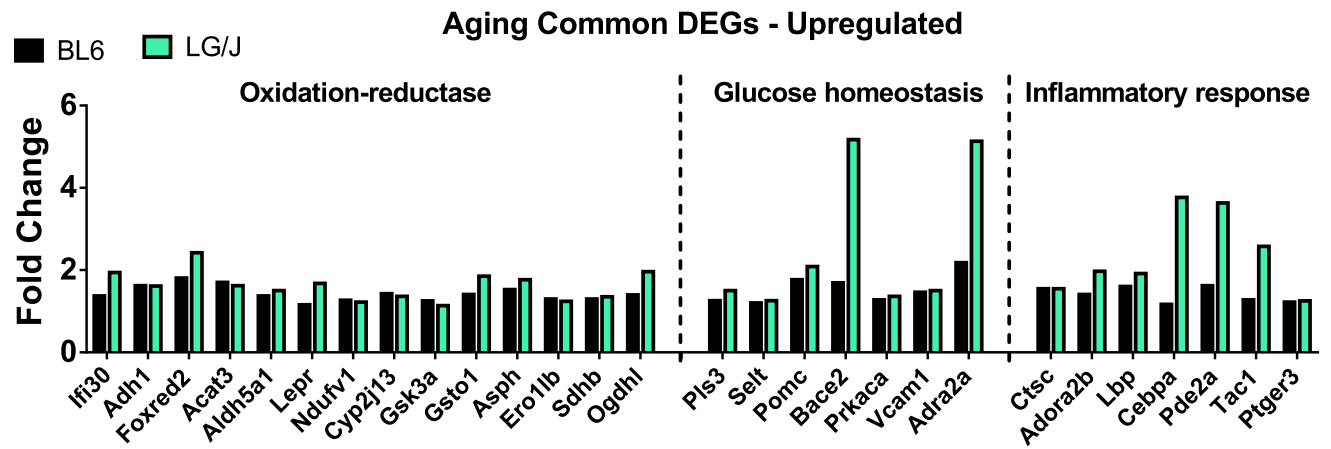

**C**

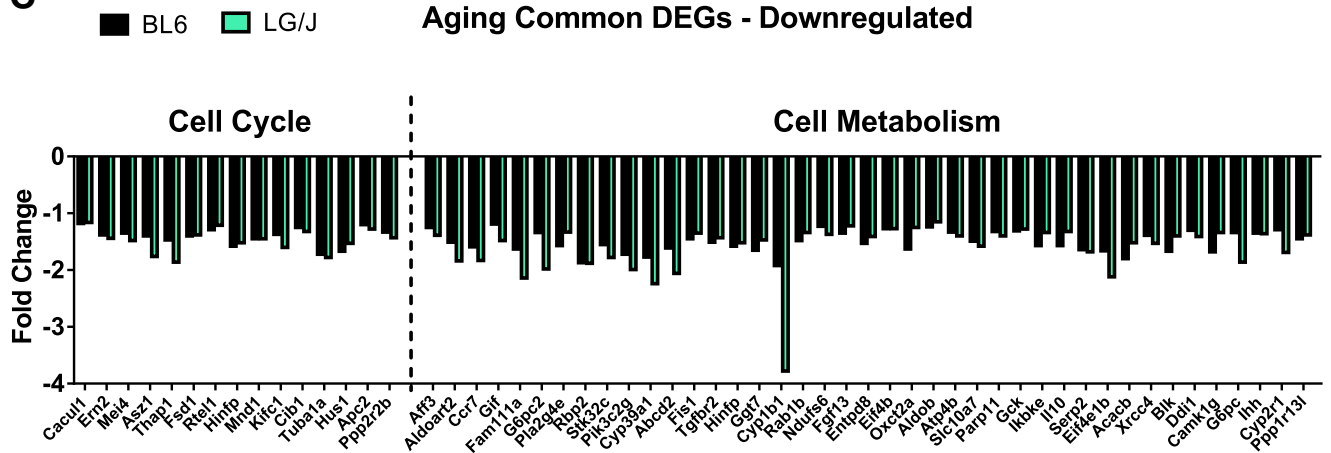

Supplementary Figure 5

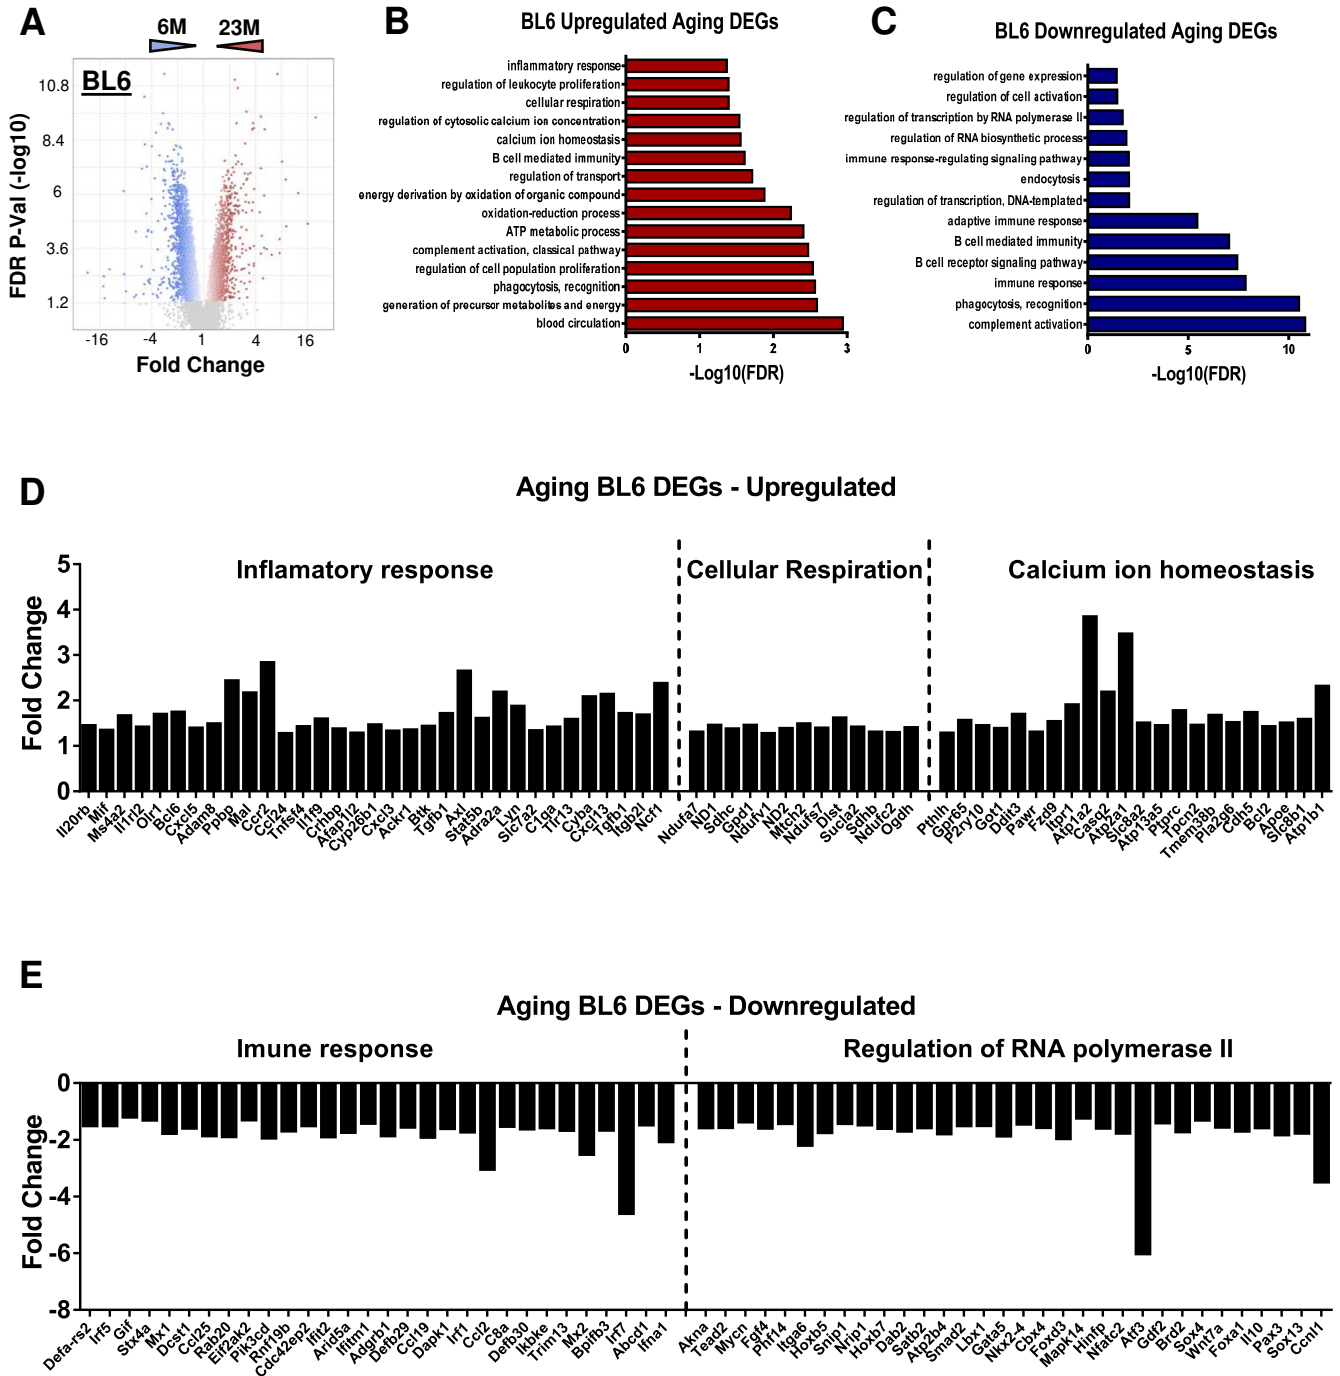

Supplementary Figure 6

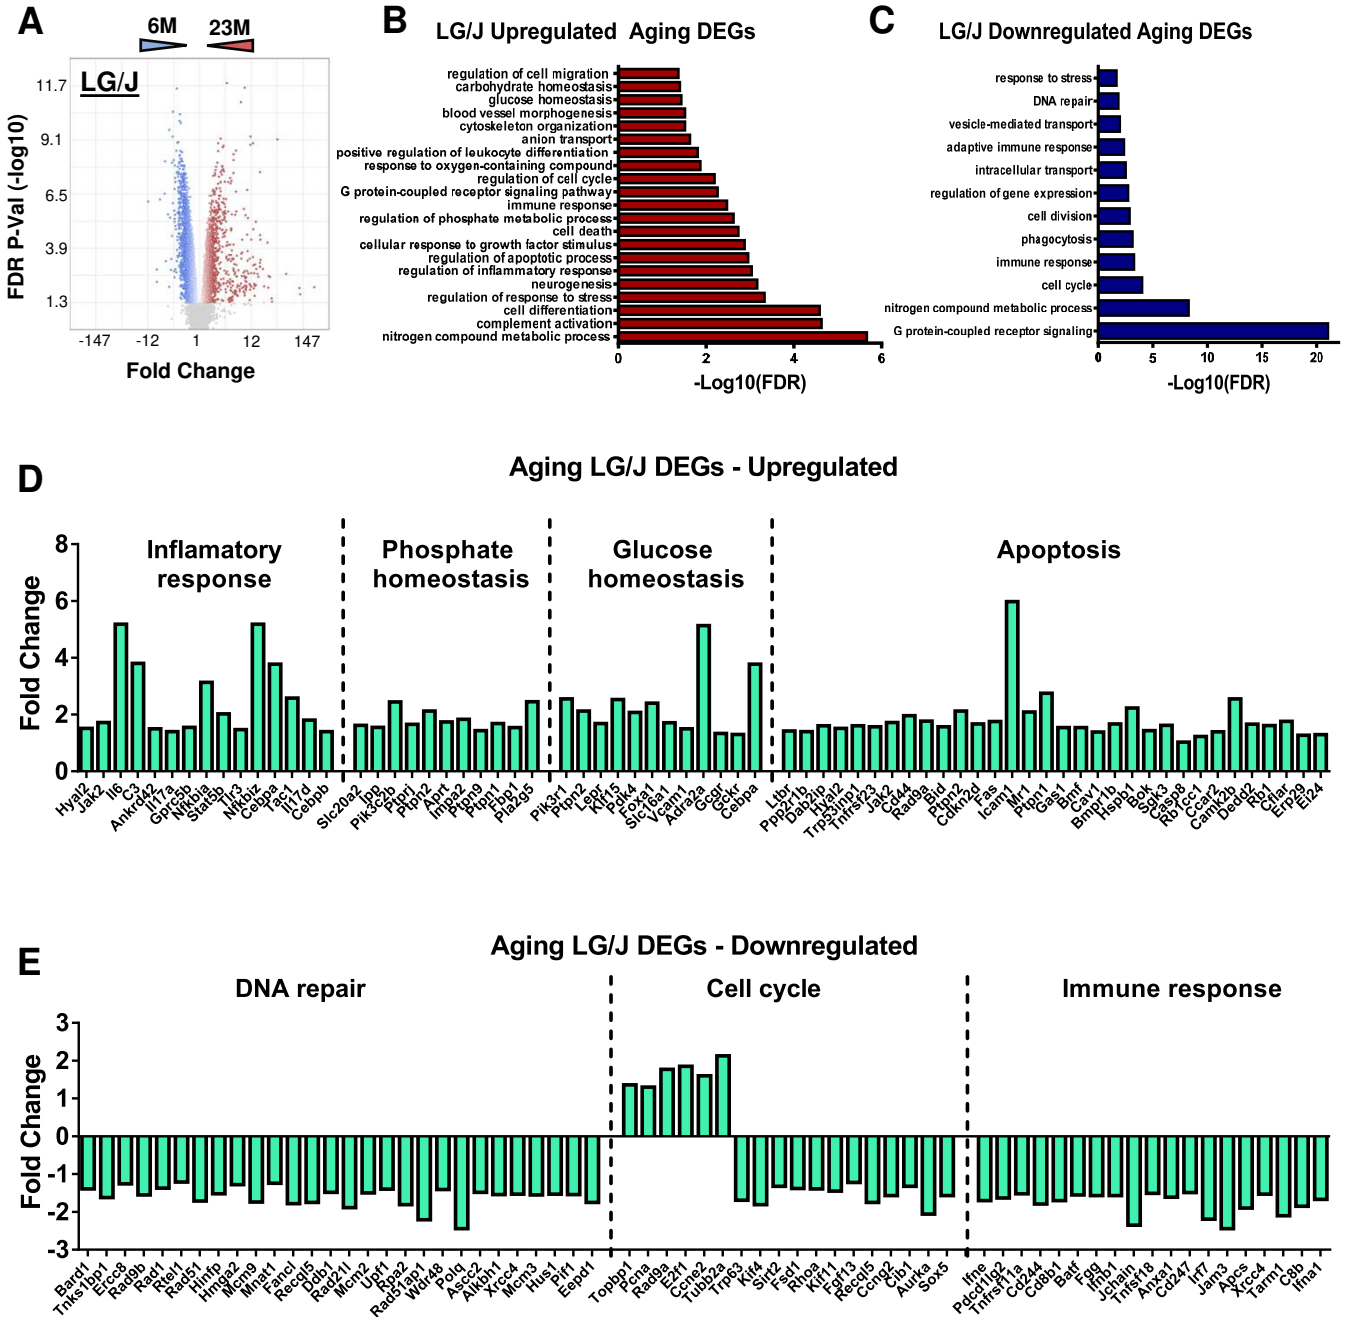

Supplementary Figure 7

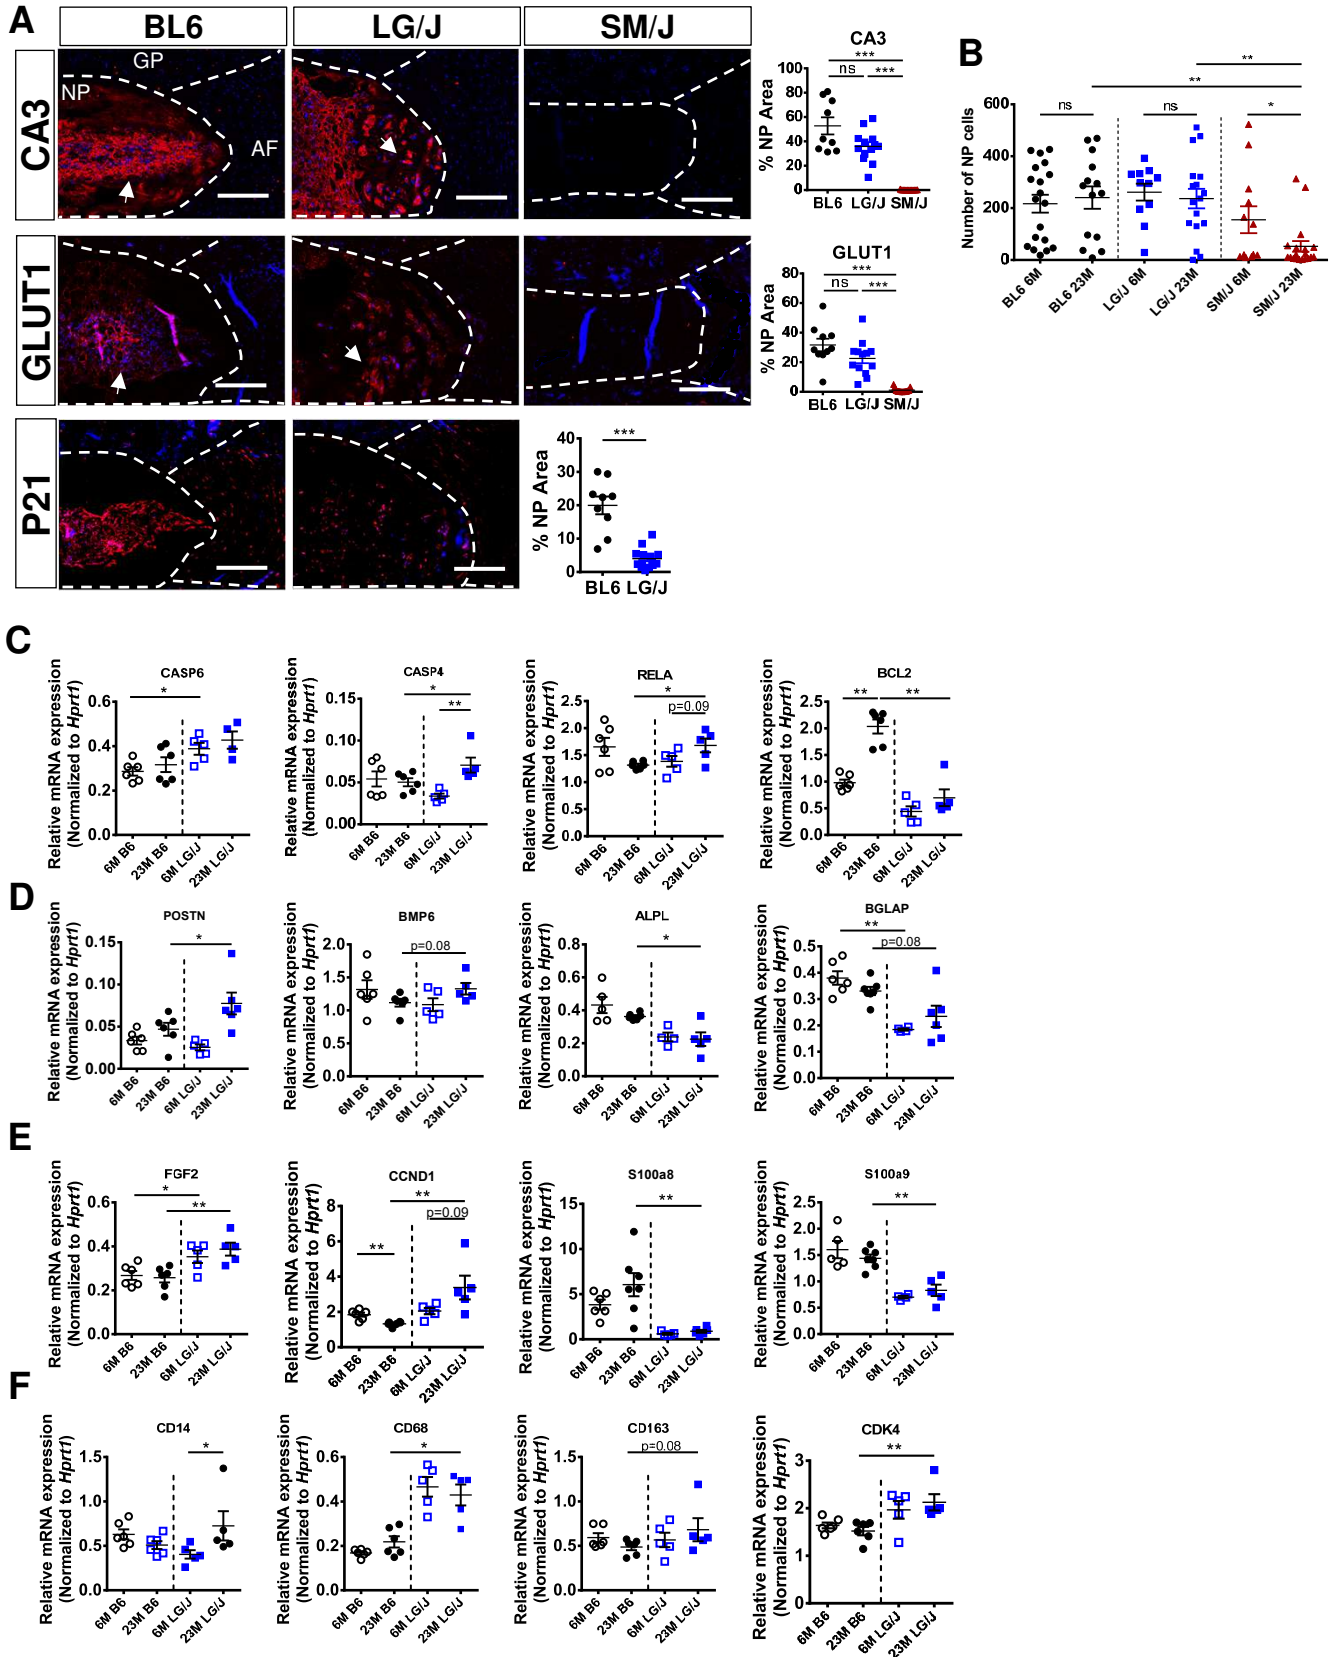

Supplementary Figure 8

Downregulated GO Human Cluster 4

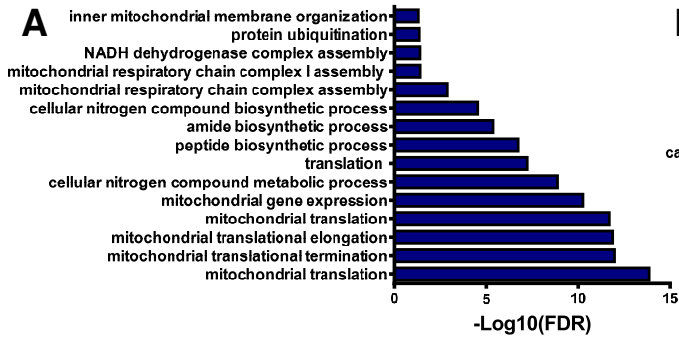

Downregulated GO Human Cluster 5

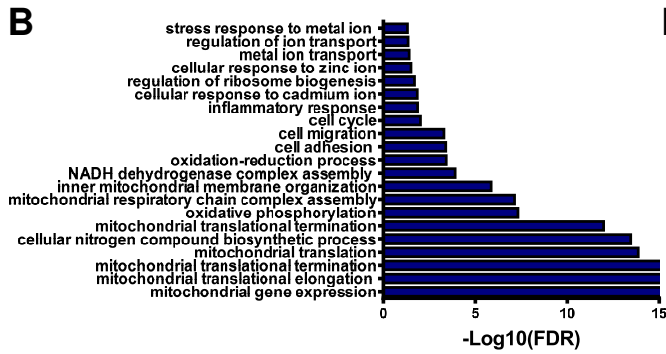

Downregulated GO Human Cluster 6

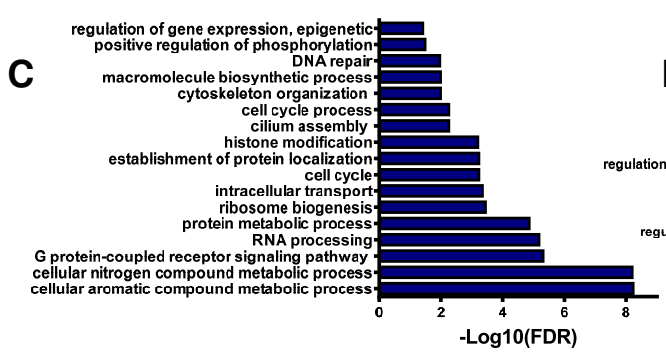

Upregulated GO Human Cluster 2

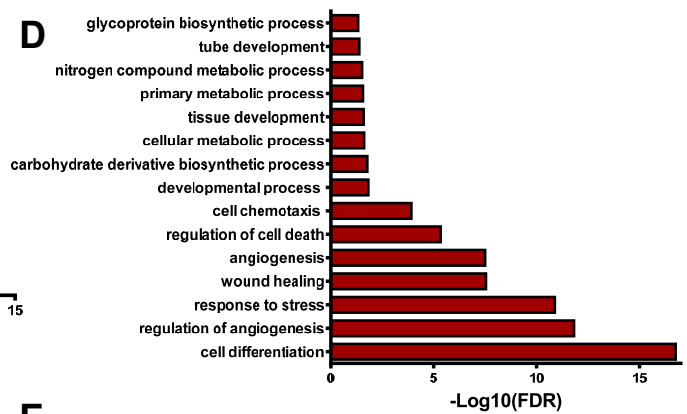

Upregulated GO Human Cluster 3

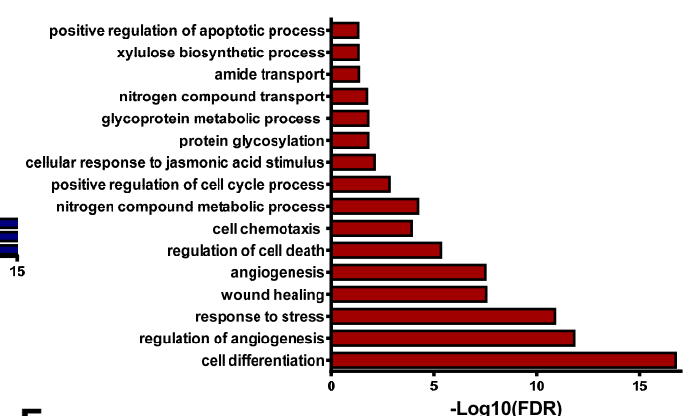

Upregulated GO Human Cluster 5

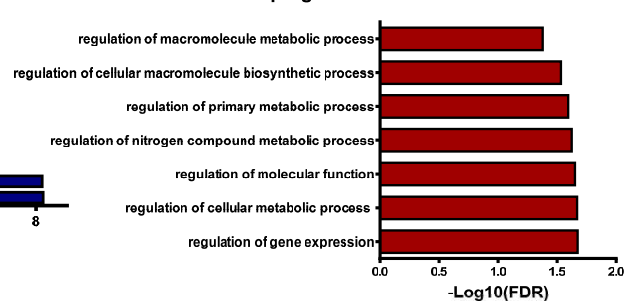

**G** Downregulated Clusters

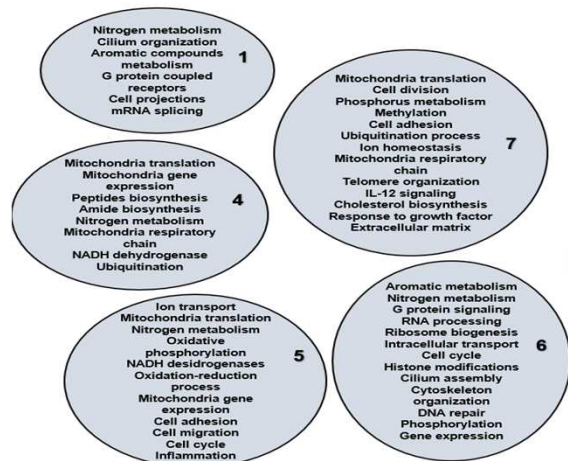

Upregulated Clusters

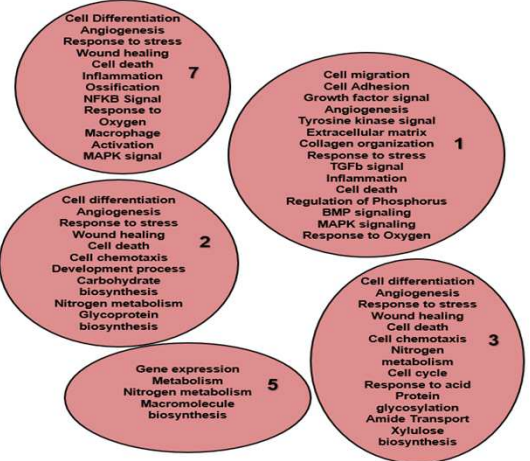

Supplement: ACEL-19-e13148-s001.pdf [file ACEL-19-e13148-s001.pdf]
